# Supplementary material for: Facile synthesis of high-purity single-twinned Au nanocrystals through manipulation of reaction kinetics
Source: Royal Society of Chemistry journal article supplement (doi:10.1039/c5ce01000d), 2015-01-01
Supplement: c5ce01000d1.pdf [file c5ce01000d1.pdf]

## Supporting Information

*for*

### **Facile synthesis of high-purity single-twinned Au nanocrystals through manipulating reaction kinetics**

*Yi Wang\*, Wensheng Fu and Xue Hu*

*Key Laboratory of Green Synthesis and Applications, and College of Chemistry,  
Chongqing Normal University, Chongqing 401331, P. R. China*

*E-mail: ywang@cqnu.edu.cn*

#### ***Experimental Section***

**Chemicals and materials.** Gold(III) chloride trihydrate ( $\text{HAuCl}_4 \cdot 3\text{H}_2\text{O}$ ,  $\geq 99.9\%$ ), hydrogen tetrabromoaurate(III) hydrate ( $\text{HAuBr}_4 \cdot x\text{H}_2\text{O}$ ), ascorbic acid (AA,  $\geq 99.0\%$ ), sodium borohydride ( $\text{NaBH}_4$ , 98%), hexadecyltrimethylammonium bromide (CTAB,  $\geq 99\%$ ), hexadecyltrimethylammonium chloride (CTAC,  $\geq 98.0\%$ ), sodium bromide ( $\text{NaBr}$ ,  $\geq 99.99\%$ ), and silver nitrate ( $\text{AgNO}_3$ , 99.9999%) were all obtained from Sigma-Aldrich and used as received. Deionized (DI) water with a resistivity of  $18.2 \text{ M}\Omega \cdot \text{cm}$  was used throughout the experiment.

**Preparation of the initial Au nanoclusters.** The initial Au nanoclusters were prepared according to a reported method with slight modification.<sup>1</sup> In detail, a fresh aqueous  $\text{NaBH}_4$  solution (10 mM, 0.6 mL) was rapidly added to a thoroughly mixed 10 mL aqueous solution containing  $\text{HAuCl}_4$  (0.25 mM) and CTAB (100 mM) using a pipette. It could be observed that a brown solution immediately formed upon the introduction of  $\text{NaBH}_4$ . The mixture was placed on an orbital shaker at a speed of 300 rpm for 2 min and

then kept undisturbed at room temperature (25 °C) for 3 h to ensure complete decomposition of NaBH<sub>4</sub> remaining in the reaction solution.

**Standard procedure for the synthesis of truncated Au RBPs.** Aqueous solutions of CTAC (200 mM, 1.0 mL), AA (10 mM, 0.2 mL), and HAuBr<sub>4</sub> (0.5 mM, 2.0 mL) were mixed with 1.0 mL of water in a 20 mL glass vial. Then, an appropriate volume (1-20 μL, see the main text for different amounts of Au nanoclusters and the corresponding size of truncated Au RBPs) of the aqueous initial Au nanoclusters were rapidly added using a pipette. The reaction was allowed to proceed undisturbedly at room temperature (25 °C) for 10 min after the solution was slightly shaken by hand for 5 seconds. The final product was collected by centrifugation at 14000 rpm for 10 min and washed with water twice prior to characterization.

**Control the Br/Au ratios for tuning the shape and crystallinity of AuNCs.** For the sample with Br/Au ratio of 4:1, the above standard procedure for the synthesis of truncated Au RBPs was employed. For the sample without Br, the standard procedure was employed except for the use of HAuCl<sub>4</sub> (0.5 mM, 2.0 mL) to replace the HAuBr<sub>4</sub> (0.5 mM, 2.0 mL) as a precursor. For other samples with Br/Au ratios of 20:1, 50:1 and 100:1, the standard procedure was also employed except for the addition of 32, 92 and 192 μL of 500 mM NaBr, respectively.

**Synthesis of single-twinned Au@Ag NCs using truncated Au RBPs as seeds.** Aqueous solutions of CTAC (20 mM, 3.0 mL), AA (10 mM, 0.2 mL), and the 20 nm truncated Au RBP seeds (0.8 mL) were mixed in a 20 mL glass vial and pre-heated at 60 °C for 10 min. Then, an aqueous solution of AgNO<sub>3</sub> (1.0 mM, 1.0 mL) was added using a syringe pump at an injection rate of 1.0 mL/h. The reaction was allowed to proceed at 60 °C for another 1 h after the injection had been completed. The final products of Au@Ag bimetallic NCs were collected by centrifugation at 10000 rpm for 10 min and washed with water once prior to characterization.

**Instrumentation.** Transmission electron microscopy (TEM) images were taken using a JEM-1400 microscope (JEOL, Japan) operated at 120 kV. The samples were prepared by dropping aqueous suspensions of the nanoparticles onto carbon-coated copper grids and dried under ambient conditions. High-resolution TEM (HRTEM) images were captured

by field-emission JEM-2100F (Japan) and Tecnai G2 F20 (USA) microscopes that were operating at 200 kV. Scanning electron microscopy (SEM) images were taken using a Hitachi S-4800 microscope (Japan) operated at 30 kV. An Eppendorf (5430, Germany) centrifuge was used for the centrifugation and washing of all samples.

**Reference:**

1. Y. Zheng, Y. Ma, J. Zeng, X. Zhong, M. Jin, Z.-Y. Li and Y. Xia, *Chem. Asian J.*, 2013, **8**, 792-799.

## Additional Figures

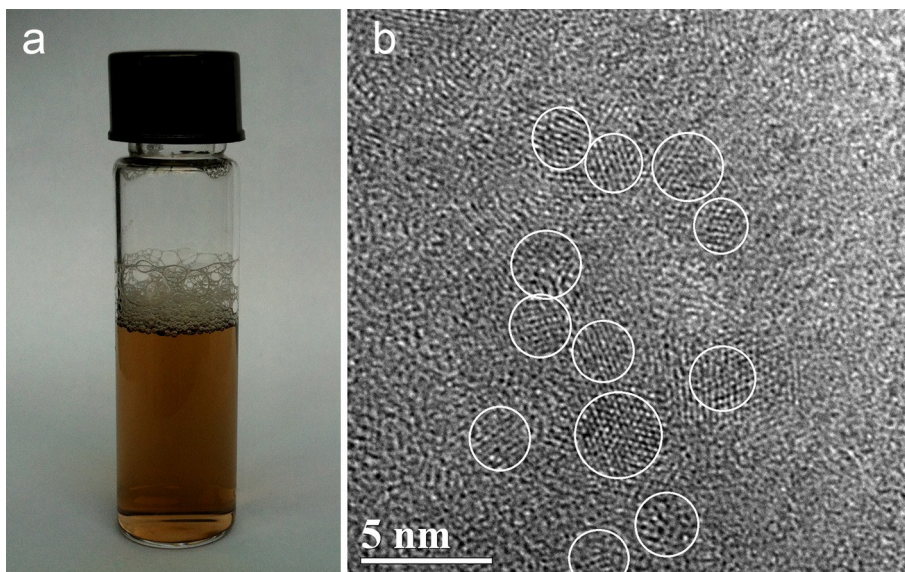

**Fig. S1** (a) Photograph of the solution and (b) HRTEM image of the Au nanoclusters that were used as initial seeds for the growth of truncated Au RBPs.

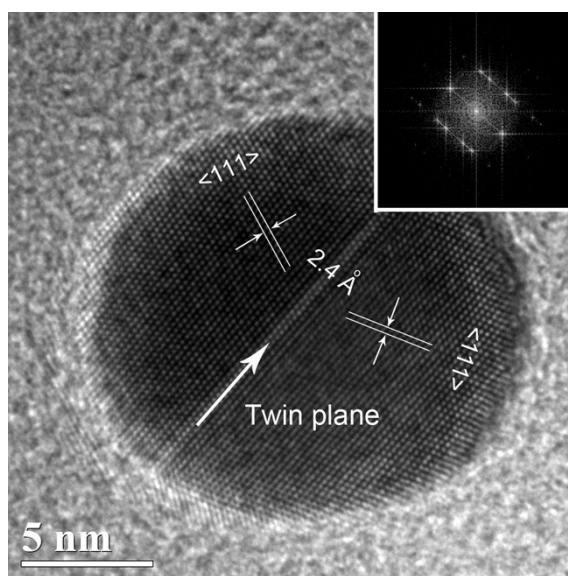

**Fig. S2** HRTEM image of a typical singly twinned Au nanocrystal that was obtained at early stage of the synthesis of truncated Au RBPs. The inset shows the corresponding FT pattern of this nanocrystal.

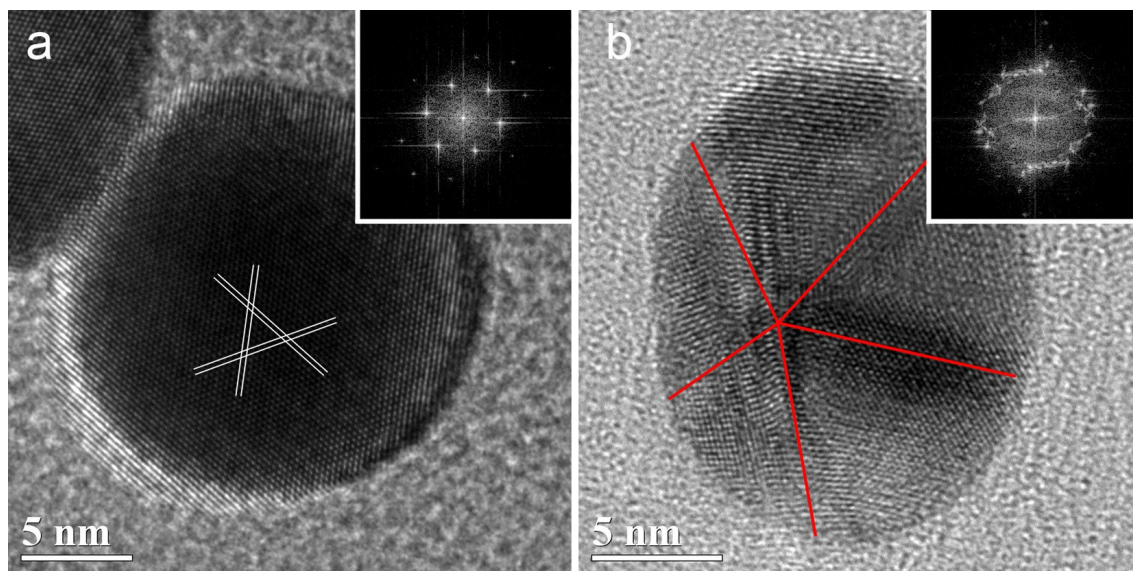

**Fig. S3** HRTEM images of the typical (a) single-crystal and (b) multiply twinned Au nanocrystals that were selected from the samples in Fig. 3a and 3d, respectively. The insets show the corresponding FT patterns for the (a) single-crystal and (b) multiply twinned Au nanocrystals, respectively. The as-marked white lines in (a) show the directions of the crystal lattice, and the red lines in (b) show the twin planes in the nanocrystal.
